# Supplementary material for: A comparative review of computational methods for pathway perturbation analysis: dynamical and topological perspectives
Source: Royal Society of Chemistry journal article supplement (doi:10.1039/c7mb00170c), 2017-07-17
Supplement: c7mb00170c1.pdf [file c7mb00170c1.pdf]

|          |                    | Hypothesis-driven methods                      |                                                                                                                                                                                                  |
|----------|--------------------|------------------------------------------------|--------------------------------------------------------------------------------------------------------------------------------------------------------------------------------------------------|
| Ref.     | Pathway models     |                                                | Features of the study                                                                                                                                                                            |
| [36]     | TGF-BETA           |                                                | Pathway response with respect to parameters perturbation                                                                                                                                         |
| [37]     |                    |                                                | Effects of clathrin and non-clathrin dependent endocytosis                                                                                                                                       |
| [38]     |                    |                                                | transient versus sustained response<br>sensitivity to ligand doses at various timescales<br>Dynamics of nuclear SMAD2 accumulation<br>SMAD2/4 concentration in function of changes in parameters |
| [39]     | RTK                |                                                | EGFR signaling response in function of ligand concentration                                                                                                                                      |
| [40]     |                    |                                                | signal efficacy in function of velocity of receptor activation                                                                                                                                   |
| [41]     |                    |                                                | Comparison between FGFR and EGFR signaling response<br>Combining EGFR and IRT pathways<br>Effects of feedback loops between EGFR and IR cascades<br>Dose dependence of pathway responses         |
| [42]     |                    |                                                | Role of ROCK in feedback loops involved in EGFR                                                                                                                                                  |
| [43]     |                    |                                                | EGFR: transient response versus sustained response                                                                                                                                               |
| [44]     |                    |                                                | EGFR: contextual dependency of the parameter sensitivity to the experimental conditions                                                                                                          |
| [45]     |                    |                                                | MAPK: identification of a negative feedback loop controlling the desensitization of signals                                                                                                      |
| [46]     |                    |                                                | MAPK: Relationship between negative feedback and robustness                                                                                                                                      |
| [47]     |                    |                                                | MAPK: Relationship between negative feedback and oscillations                                                                                                                                    |
| [49]     | NF-kB              |                                                | Analysis of oscillatory behavior of nuclear NF-kB concentration                                                                                                                                  |
| [50]     |                    |                                                | links between negative feedback and cellular heterogeneity                                                                                                                                       |
| [52]     |                    |                                                | Identification of a delayed negative feedback loop responsible for oscillations in NF-kB translocation                                                                                           |
| [53]     |                    |                                                | Analysis of importance of IκB degradation using sensitivity analysis                                                                                                                             |
| [54, 55] | Apoptosis          |                                                | Oscillation and negative feedback involving p53 and MDM2                                                                                                                                         |
| [56]     |                    |                                                | Bistability and positive feedback loop between p53 and AKT                                                                                                                                       |
| [57]     |                    |                                                | Analysis of topological structures controlling bistability switch                                                                                                                                |
| [58]     | WNT                |                                                | Positive feedback loop between WNT and ERK pathways                                                                                                                                              |
| [59]     |                    |                                                | Sustained versus transient WNT stimulation                                                                                                                                                       |
| [60]     |                    |                                                | Oscillations controlled by negative feedback                                                                                                                                                     |
| [62]     | mTOR               |                                                | dynamical relationships between insulin regulation and gene transcription                                                                                                                        |
| [63]     |                    |                                                | amino-acid dependent regulation of mTORC1 activation                                                                                                                                             |
|          |                    | Data-driven methods                            |                                                                                                                                                                                                  |
|          |                    | Third generation methods                       |                                                                                                                                                                                                  |
|          | Name of the method |                                                | Features of the method                                                                                                                                                                           |
| [76]     | PLAGE              |                                                | Computes pairwise comparisons of pathway activity levels                                                                                                                                         |
| [77]     | SPIA               |                                                | Identify metagene using SVD                                                                                                                                                                      |
| [79]     | DART               |                                                | Compute perturbation probabilities using DEGs of pathways<br>Infer the activity of pathways using a set of DEGs<br>Verify the coherence of the prior pathway information and topology            |
|          |                    | Fourth generation methods                      |                                                                                                                                                                                                  |
|          | Name of the method | Topological decomposition                      | Features of the method                                                                                                                                                                           |
| [80]     | Clipper            | Topological decomposition using cliques on DAG | Identify dynamic perturbation of pathways                                                                                                                                                        |
| [82]     | Pathways           | Use circuits in pathways (Dijkstra)            | Compute the probability of signal transmission along the pathways                                                                                                                                |
| [21]     | sub-SPIA           | Use Minimal Spanning Tree (MST)                | Mapping of DEGs on pathway maps                                                                                                                                                                  |
| [83]     | IPANDA             | Use concept of gene modules                    | Pathway activation scores using clustering                                                                                                                                                       |

**Table 1:** Summary of the mechanism-based model developed for hypothesis-driven studies and summary of the main data-driven methods available for pathway perturbation analysis.
